# Supplementary material
Source: PubMed Central journal article supplement (PMC10238781)
Supplement: 40675_2023_258_MOESM1_ESM.pdf [file 40675_2023_258_MOESM1_ESM.pdf]

|                              | Risk of bias |    |    |         |
|------------------------------|--------------|----|----|---------|
|                              | D1           | D2 | D3 | Overall |
| Abdali et al., 2019          | +            | +  | +  | +       |
| Abdulghaniet al., 2012       | +            | +  | +  | +       |
| AL Khani et al., 2019        | -            | +  | +  | -       |
| Al otaibi et al., 2020       | -            | +  | +  | -       |
| Al Shammari et al., 2020     | -            | +  | +  | -       |
| Al Sulami et al., 2019       | +            | +  | +  | +       |
| Almojaliet al., 2017         | -            | +  | +  | -       |
| Alnomsi et al., 2018         | -            | +  | +  | -       |
| AlQahtani et al., 2017       | -            | +  | +  | -       |
| Alsaggafet al., 2016         | -            | +  | +  | -       |
| Alshahrani et al., 2019      | -            | -  | +  | -       |
| Amiri et al., 2020           | -            | +  | +  | -       |
| Asiri et al., 2018           | -            | +  | +  | -       |
| Atlam et al., 2020           | +            | +  | +  | +       |
| Attal et al., 2021           | -            | +  | +  | -       |
| Awasthi et al., 2020         | -            | +  | +  | -       |
| BaHammamet al., 2005         | -            | +  | +  | -       |
| Belingerheri et al., 2020    | -            | +  | +  | -       |
| Bogati et al., 2020          | -            | +  | +  | -       |
| Bricket al., 2010            | -            | +  | +  | -       |
| Brubaker et al., 2020        | -            | +  | +  | -       |
| Carpi et al., 2022           | +            | +  | +  | +       |
| Chatterjee et al., 2021      | -            | +  | +  | -       |
| Chen et al., 2022            | +            | -  | +  | -       |
| Christodoulou et al., 2021   | -            | +  | +  | -       |
| Copaja–Corzo et al., 2022    | +            | -  | +  | -       |
| Corraeat al., 2017           | -            | +  | +  | -       |
| Dhamija et al., 2021         | +            | +  | +  | +       |
| Ding et al., 2022            | +            | +  | +  | +       |
| Dudo et al., 2022            | +            | -  | +  | -       |
| EiArab et al., 2014          | +            | +  | +  | +       |
| Eleftheriou et al., 2021     | +            | -  | +  | -       |
| Elwasifyet al., 2016         | +            | +  | +  | +       |
| Ergin et al., 2021           | -            | -  | +  | -       |
| Fawzy and Hamed 2017         | +            | +  | +  | +       |
| Feng et al., 2022            | +            | -  | +  | -       |
| Fernandes et al., 2022       | -            | +  | +  | -       |
| Fowler et al., 2022          | X            | +  | +  | X       |
| Giri et al., 2013            | X            | +  | +  | X       |
| Gladius et al., 2018         | -            | +  | +  | -       |
| Gui et al., 2022             | +            | +  | +  | +       |
| Guo et al., 2022             | X            | +  | +  | X       |
| Gupta et al., 2020           | -            | +  | +  | -       |
| Ibrahimet al., 2017          | +            | -  | +  | -       |
| James et al., 2011           | -            | +  | +  | -       |
| Javid et al., 2020           | +            | +  | +  | +       |
| Jniene et al., 2019          | -            | +  | +  | -       |
| Johnson et al., 2017         | -            | +  | +  | -       |
| Kalyaniet al., 2017          | -            | +  | +  | -       |
| Kang and Chen et al., 2009   | -            | +  | +  | -       |
| Kawyannejad et al., 2019     | -            | +  | +  | -       |
| Khero et al., 2019           | -            | -  | +  | -       |
| Kumar et al., 2019           | -            | -  | +  | -       |
| Kumaret al., 2016            | -            | +  | +  | -       |
| Lamoria et al., 2020         | -            | +  | +  | -       |
| Lawson et al., 2019          | -            | +  | +  | -       |
| Li et al., 2022              | -            | +  | +  | -       |
| Lima et al., 2002            | X            | +  | +  | X       |
| Mahadule et al., 2022        | -            | +  | +  | -       |
| Maheshwari et al., 2019      | +            | -  | +  | -       |
| Mahgoub et al., 2022         | -            | -  | +  | -       |
| Mazar et al., 2021           | X            | +  | +  | X       |
| Mazurkiewiczet al., 2012     | X            | +  | +  | X       |
| Medeiros et al., 2001        | X            | +  | +  | X       |
| Meer et al., 2022            | X            | +  | +  | X       |
| Meo et al., 2022             | +            | -  | +  | -       |
| Mirghaniet al., 2015         | -            | -  | +  | -       |
| Mirghaniet al., 2017         | -            | +  | +  | -       |
| Mishra et al., 2022          | -            | +  | +  | -       |
| Mohammadbeigiet al., 2016    | -            | +  | +  | -       |
| Mokroset al., 2017           | -            | +  | +  | -       |
| Nadeem et al., 2018          | -            | +  | +  | -       |
| Nsengimana et al., 2023      | -            | +  | +  | -       |
| Olarte–Durand et al., 2021   | -            | +  | +  | -       |
| Pagninet al., 2014           | -            | +  | +  | -       |
| Patil et al., 2019           | +            | +  | +  | +       |
| Perotta et al., 2021         | +            | +  | +  | +       |
| Prashanth et al., 2015       | +            | +  | +  | +       |
| Priya et al., 2017           | -            | +  | +  | -       |
| Ramamoorthy et al., 2014     | -            | +  | +  | -       |
| Rasekhiet al., 2016          | -            | +  | +  | -       |
| Rathi et al., 2018           | -            | +  | +  | -       |
| Riqueet al., 2013            | -            | +  | +  | -       |
| Riskawati et al., 2022       | +            | +  | +  | +       |
| Safhi et al., 2020           | -            | +  | +  | -       |
| Saguem et al., 2021          | -            | -  | +  | -       |
| Sahraian and Javadvpour 2010 | -            | +  | +  | -       |
| Sarbavzat Janet al., 2017    | X            | +  | +  | X       |
| Satti et al., 2019           | -            | -  | +  | -       |
| Sayginet al., 2016           | -            | +  | +  | -       |
| Shadzi et al., 2020          | +            | +  | +  | +       |
| Shafique et al., 2021        | -            | +  | +  | -       |
| Shrestha et al., 2021        | -            | +  | +  | -       |
| Siddiquiet al., 2016         | -            | +  | +  | -       |
| Soakin et al., 2019          | X            | +  | +  | X       |
| Sun et al., 2019             | +            | +  | +  | +       |
| Sundas et al., 2020          | -            | +  | +  | -       |
| Suraniet al., 2015           | +            | +  | +  | +       |
| Tahir et al., 2021           | +            | -  | +  | -       |
| Teimouri et al., 2021        | -            | -  | +  | -       |
| Thaipisuttikul et al., 2022  | -            | +  | +  | -       |
| Wang et al., 2020            | +            | +  | +  | +       |
| Wanget al., 2016             | +            | +  | +  | +       |
| Waqaset al., 2015            | -            | +  | +  | -       |
| Wondi et al., 2021           | +            | +  | +  | +       |
| Xie et al., 2020             | +            | +  | +  | +       |
| Yazdiet al., 2016            | -            | +  | +  | -       |
| Yeluri et al., 2021          | -            | -  | +  | -       |
| Zailinawatiet al., 2009      | +            | +  | +  | +       |

D1: Selection  
D2: Comparison  
D3: Outcome

Judgement  
X High  
- Moderate  
+ Low
