# Supplementary material
Source: PubMed Central journal article supplement (PMC10238781)

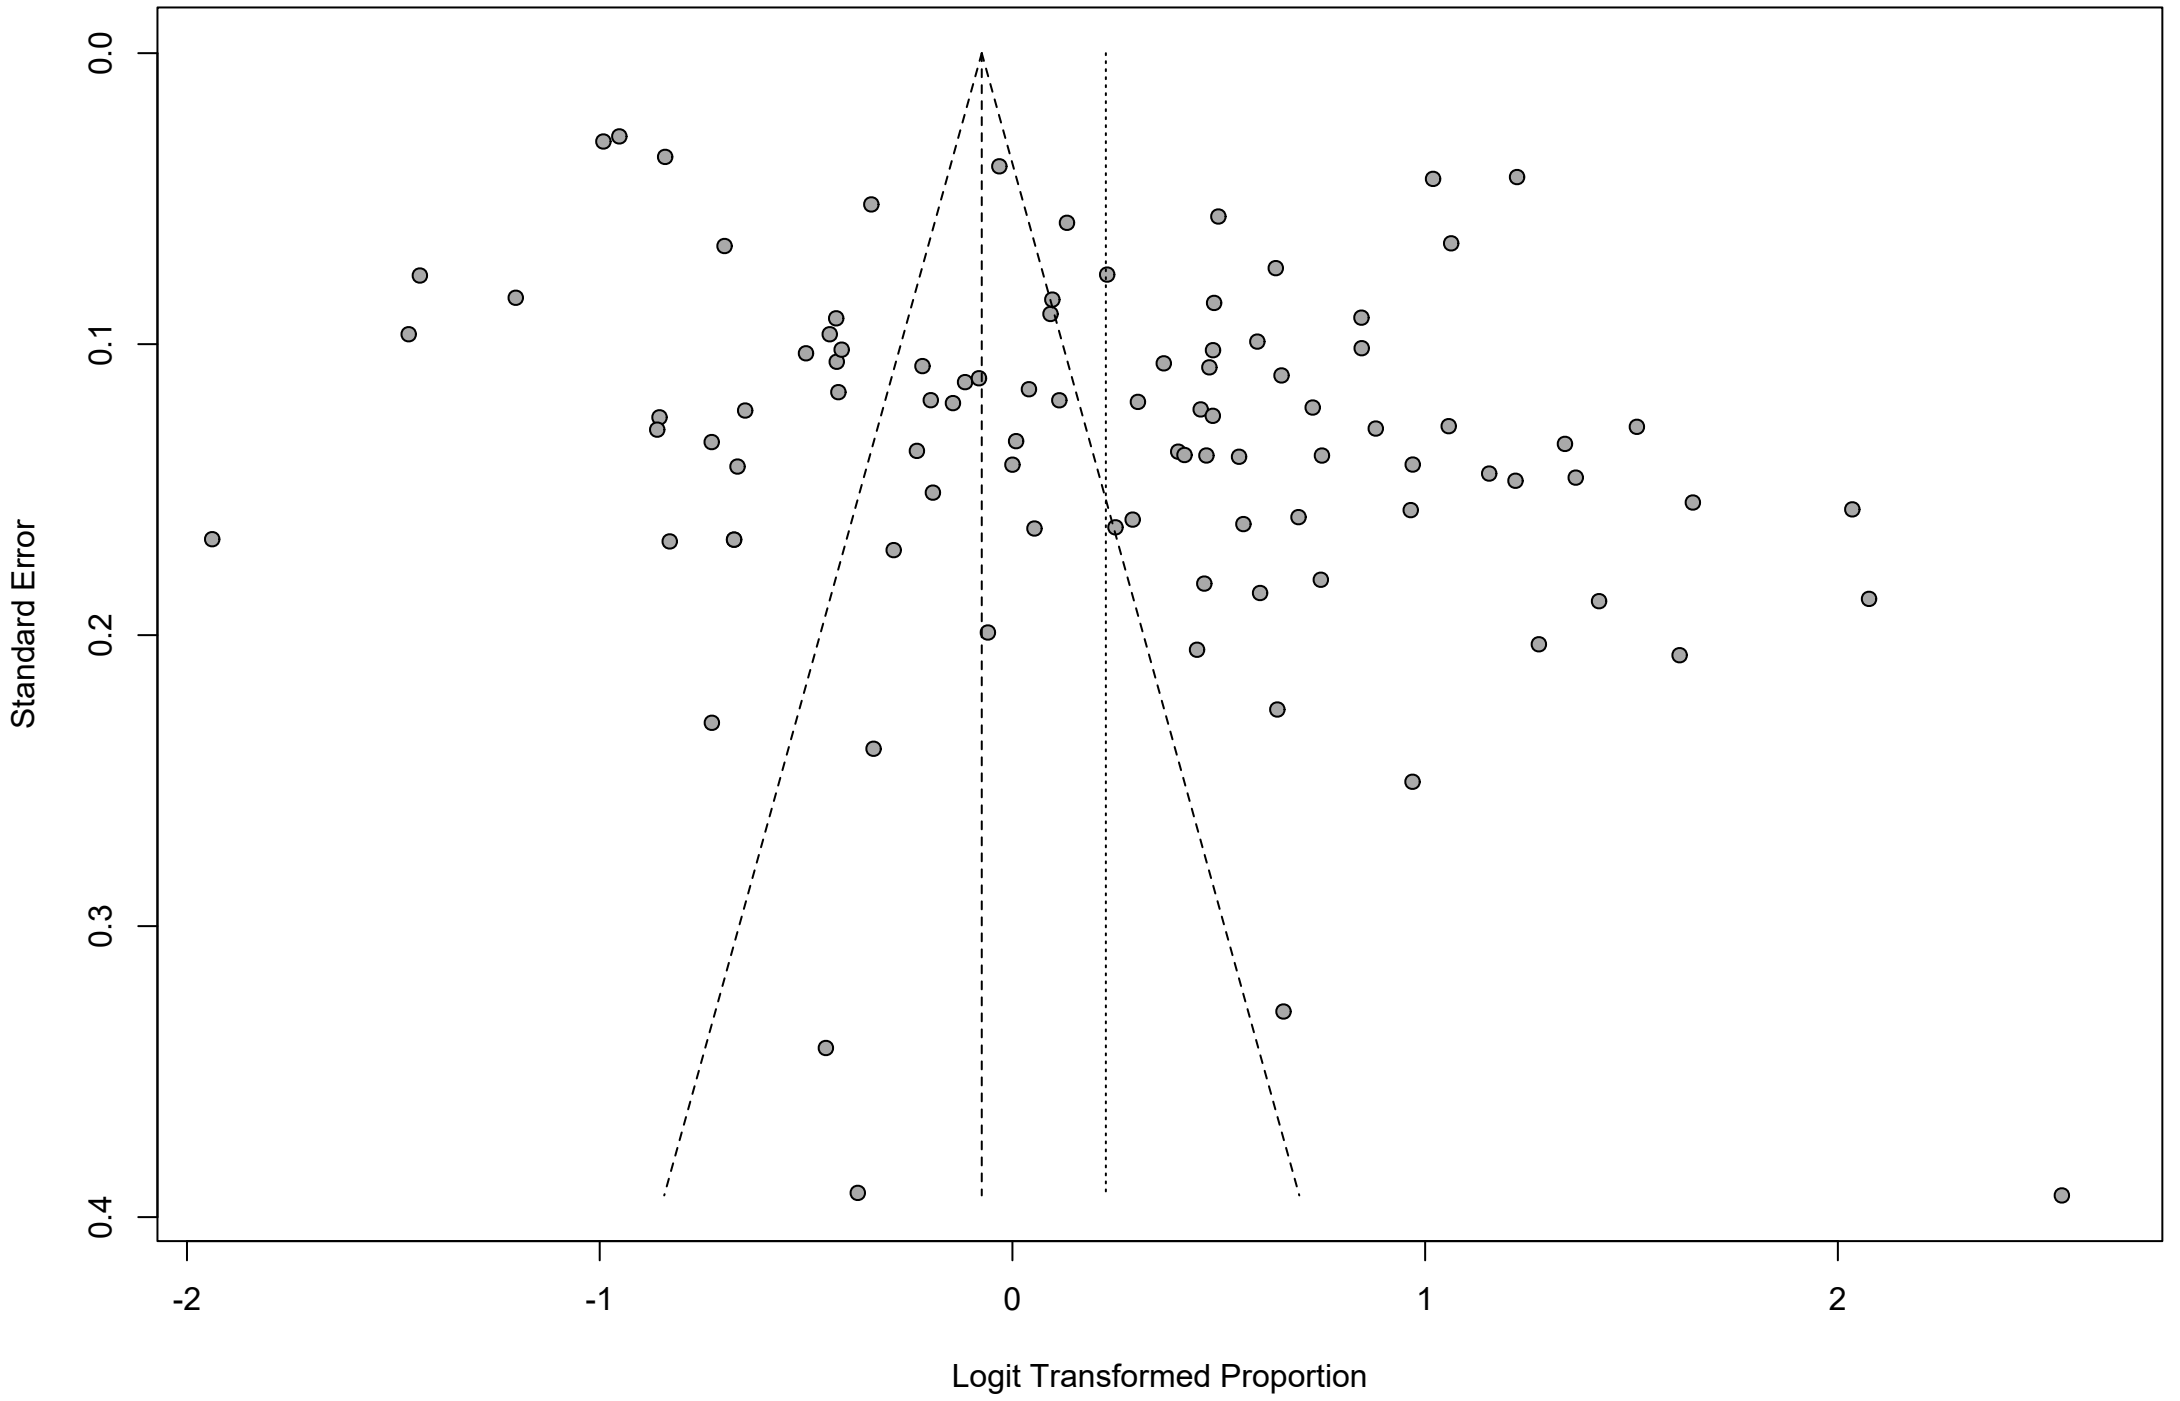

Supplement: 40675_2023_258_MOESM2_ESM.pdf [file 40675_2023_258_MOESM2_ESM.pdf]

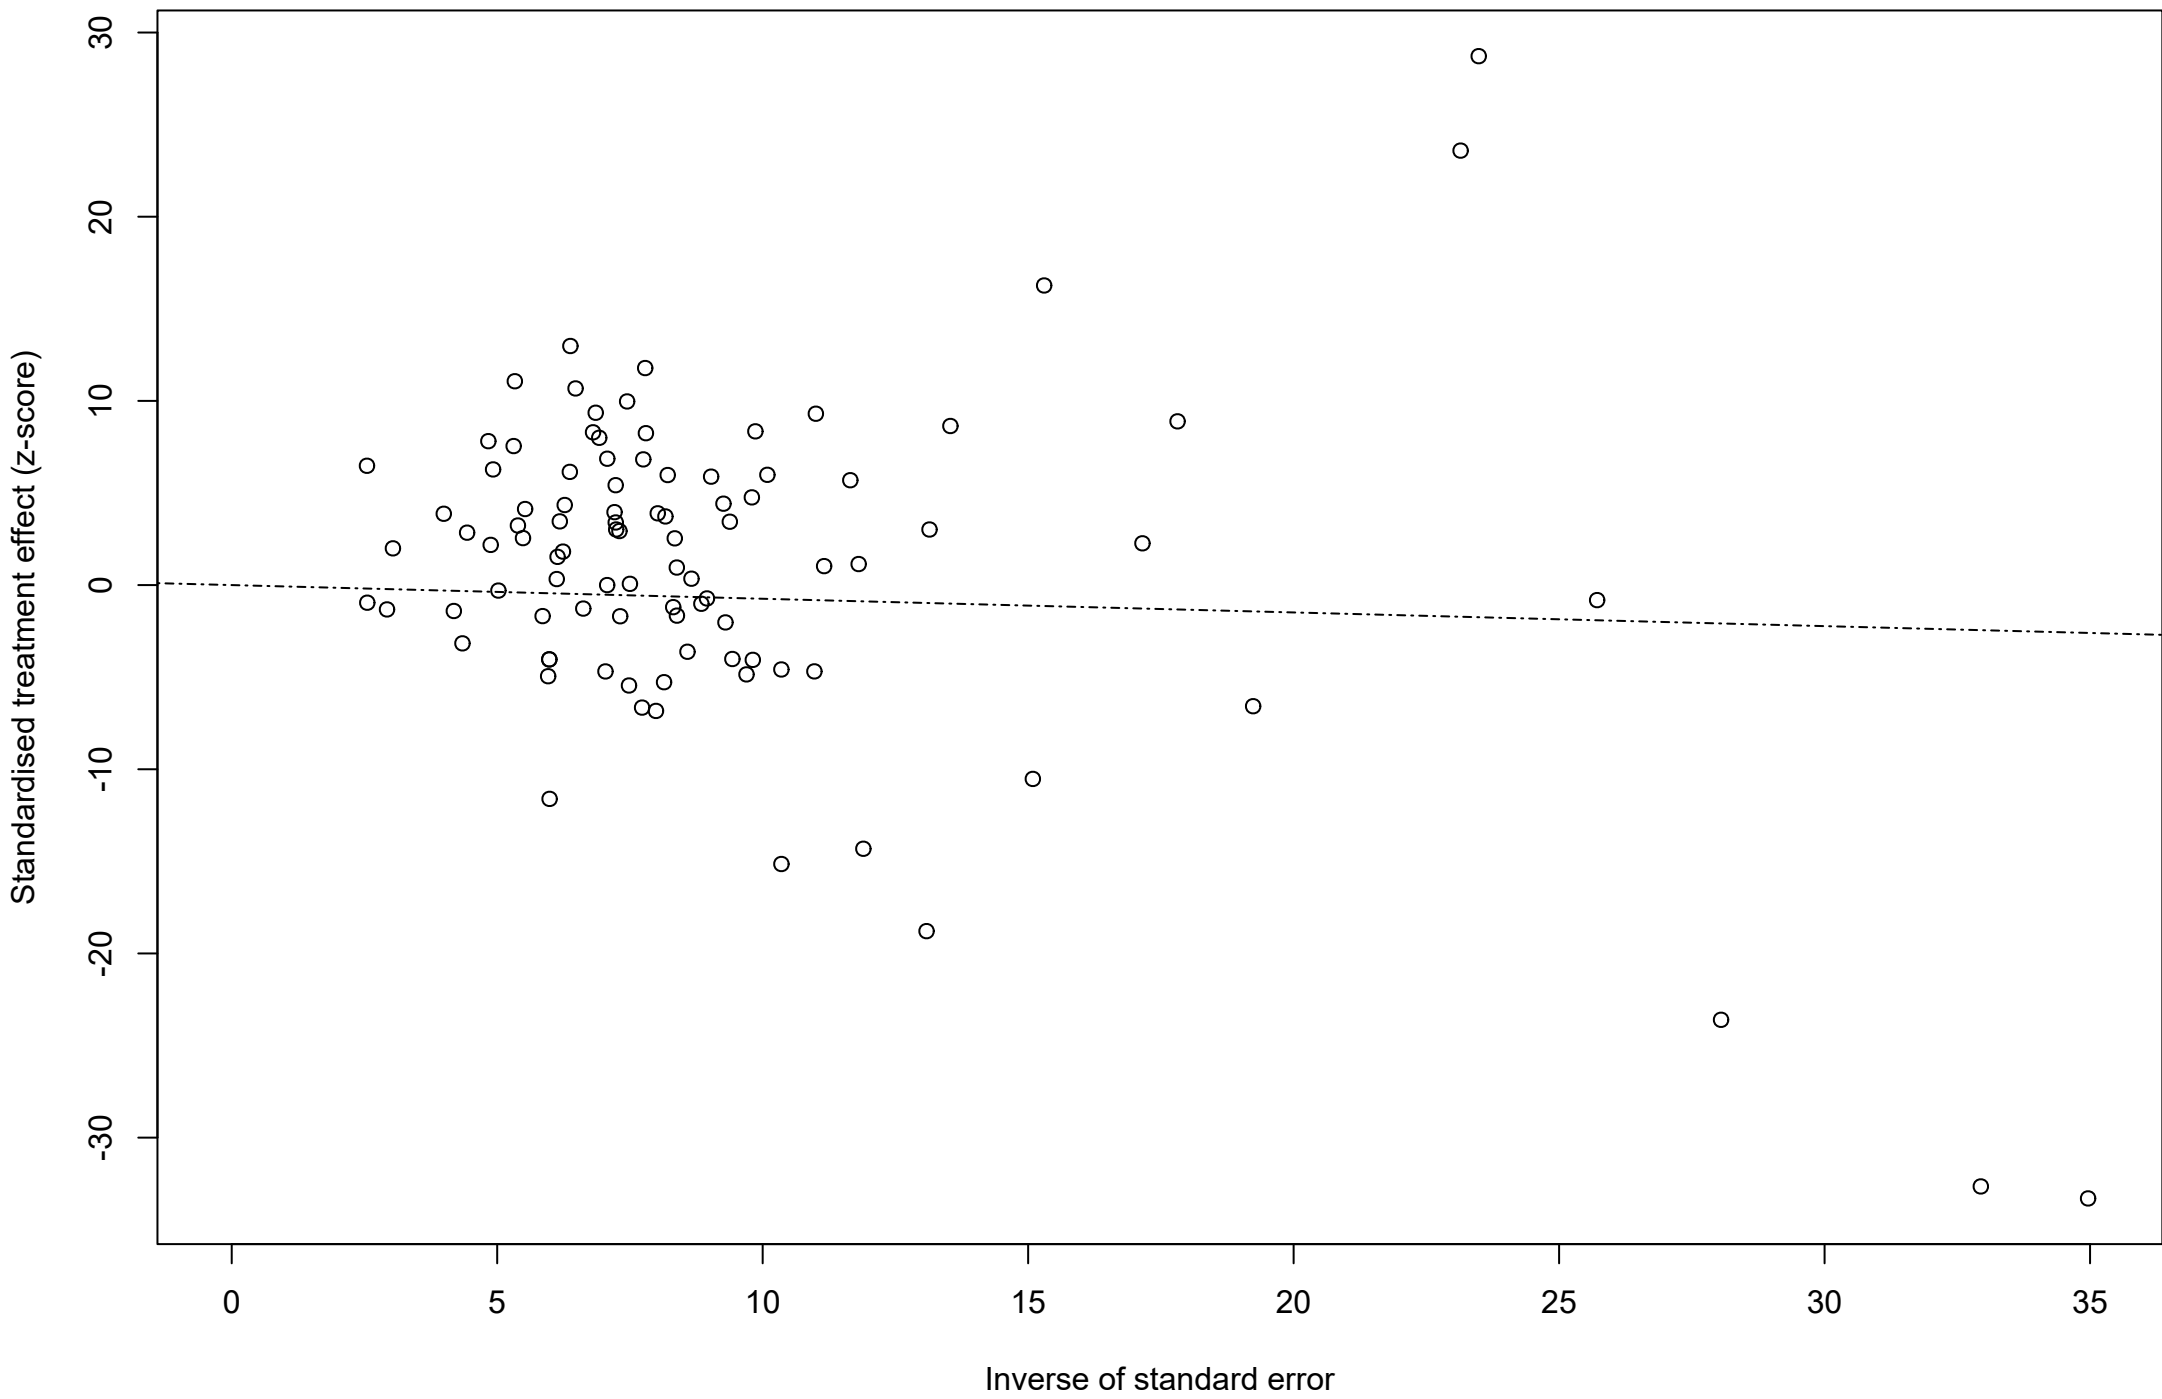

Supplement: 40675_2023_258_MOESM3_ESM.pdf [file 40675_2023_258_MOESM3_ESM.pdf]

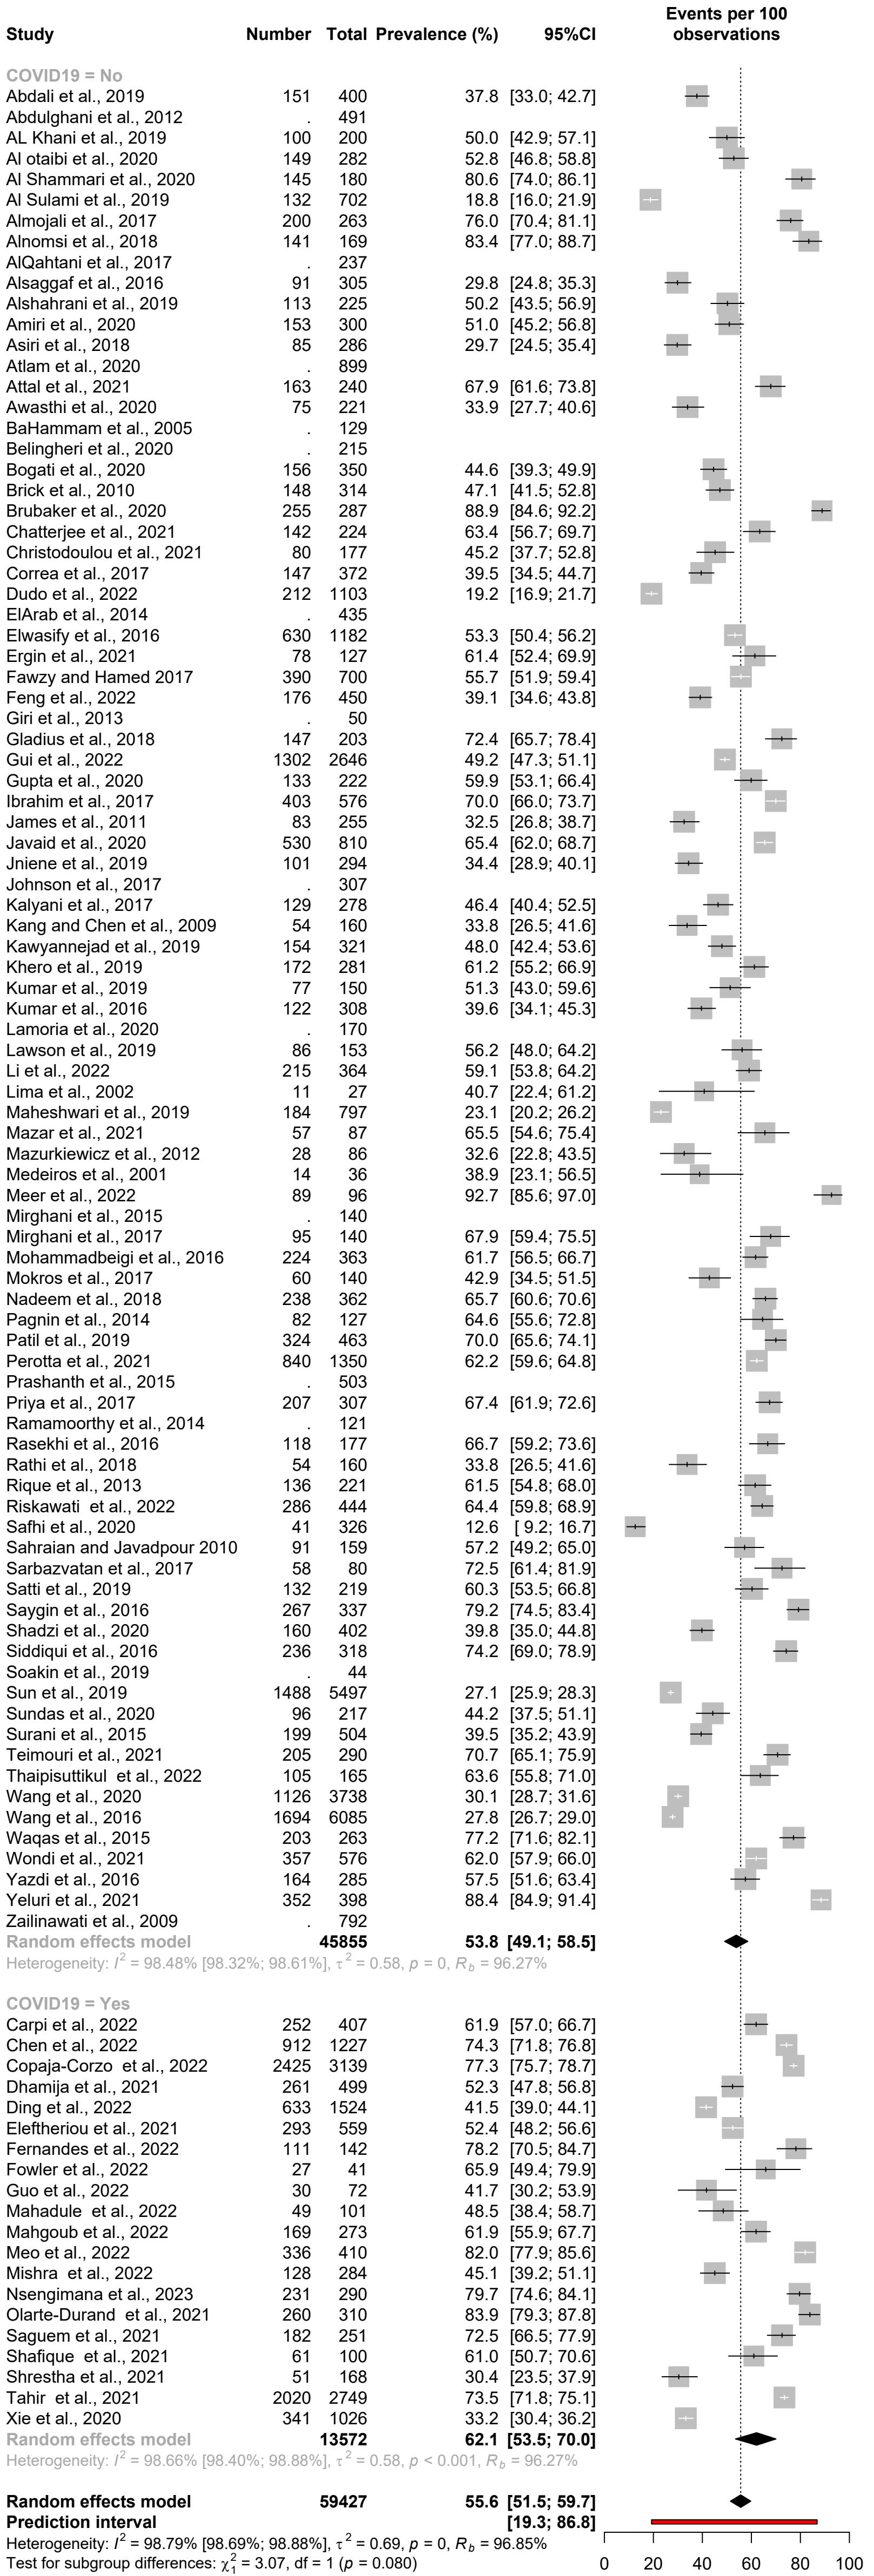

Supplement: 40675_2023_258_MOESM4_ESM.pdf [file 40675_2023_258_MOESM4_ESM.pdf]

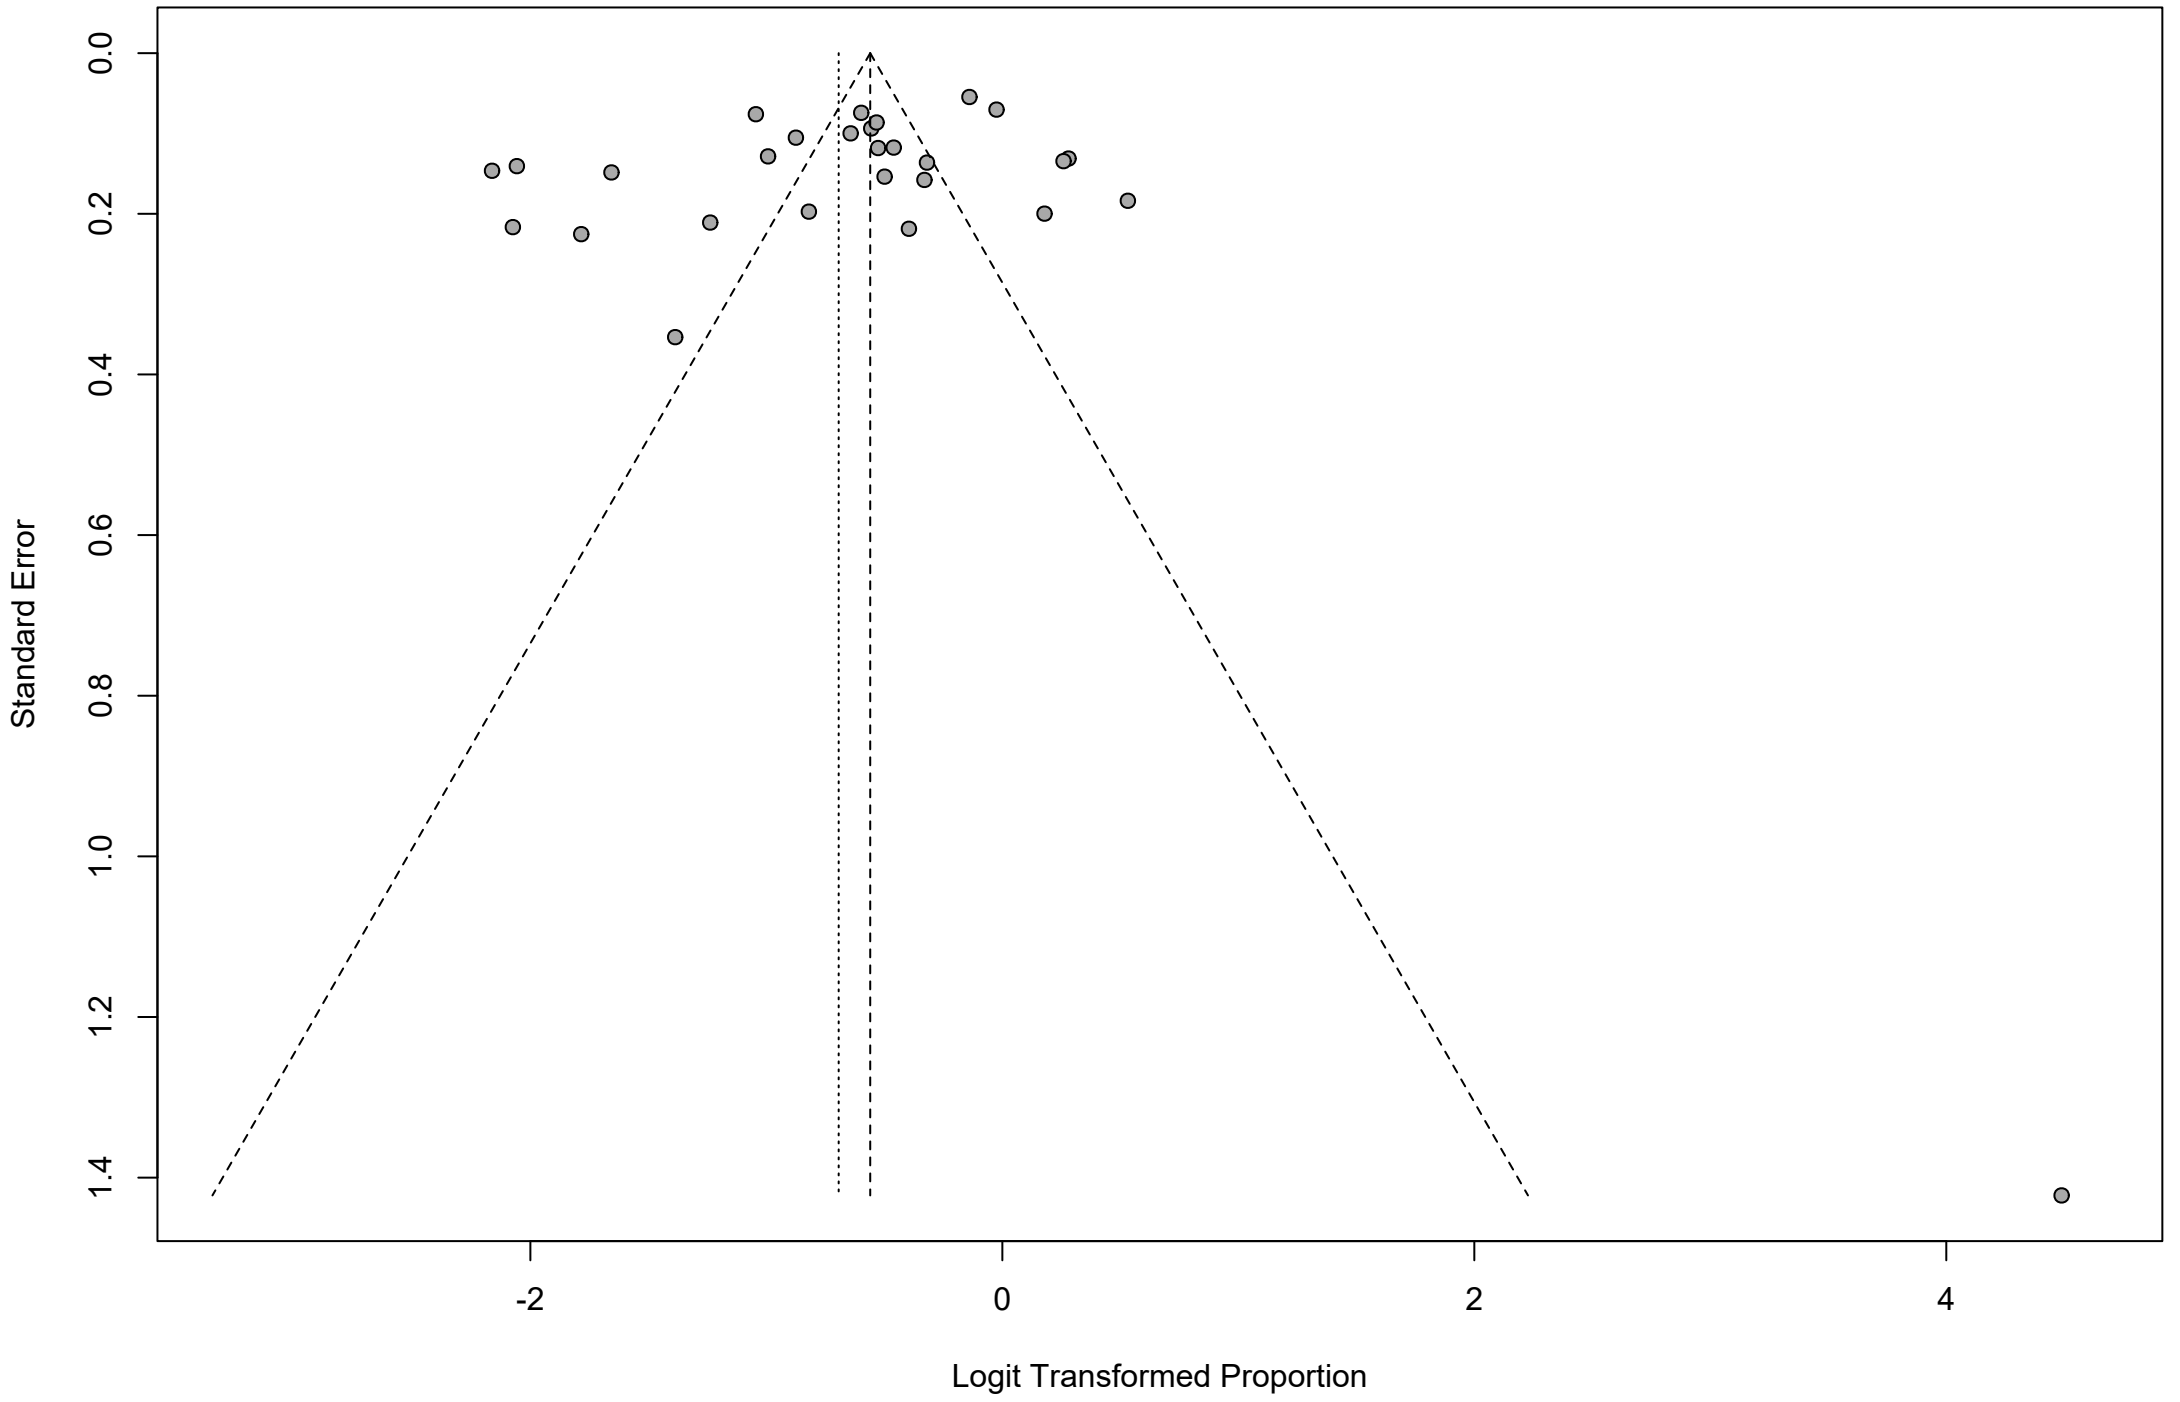

Supplement: 40675_2023_258_MOESM5_ESM.pdf [file 40675_2023_258_MOESM5_ESM.pdf]

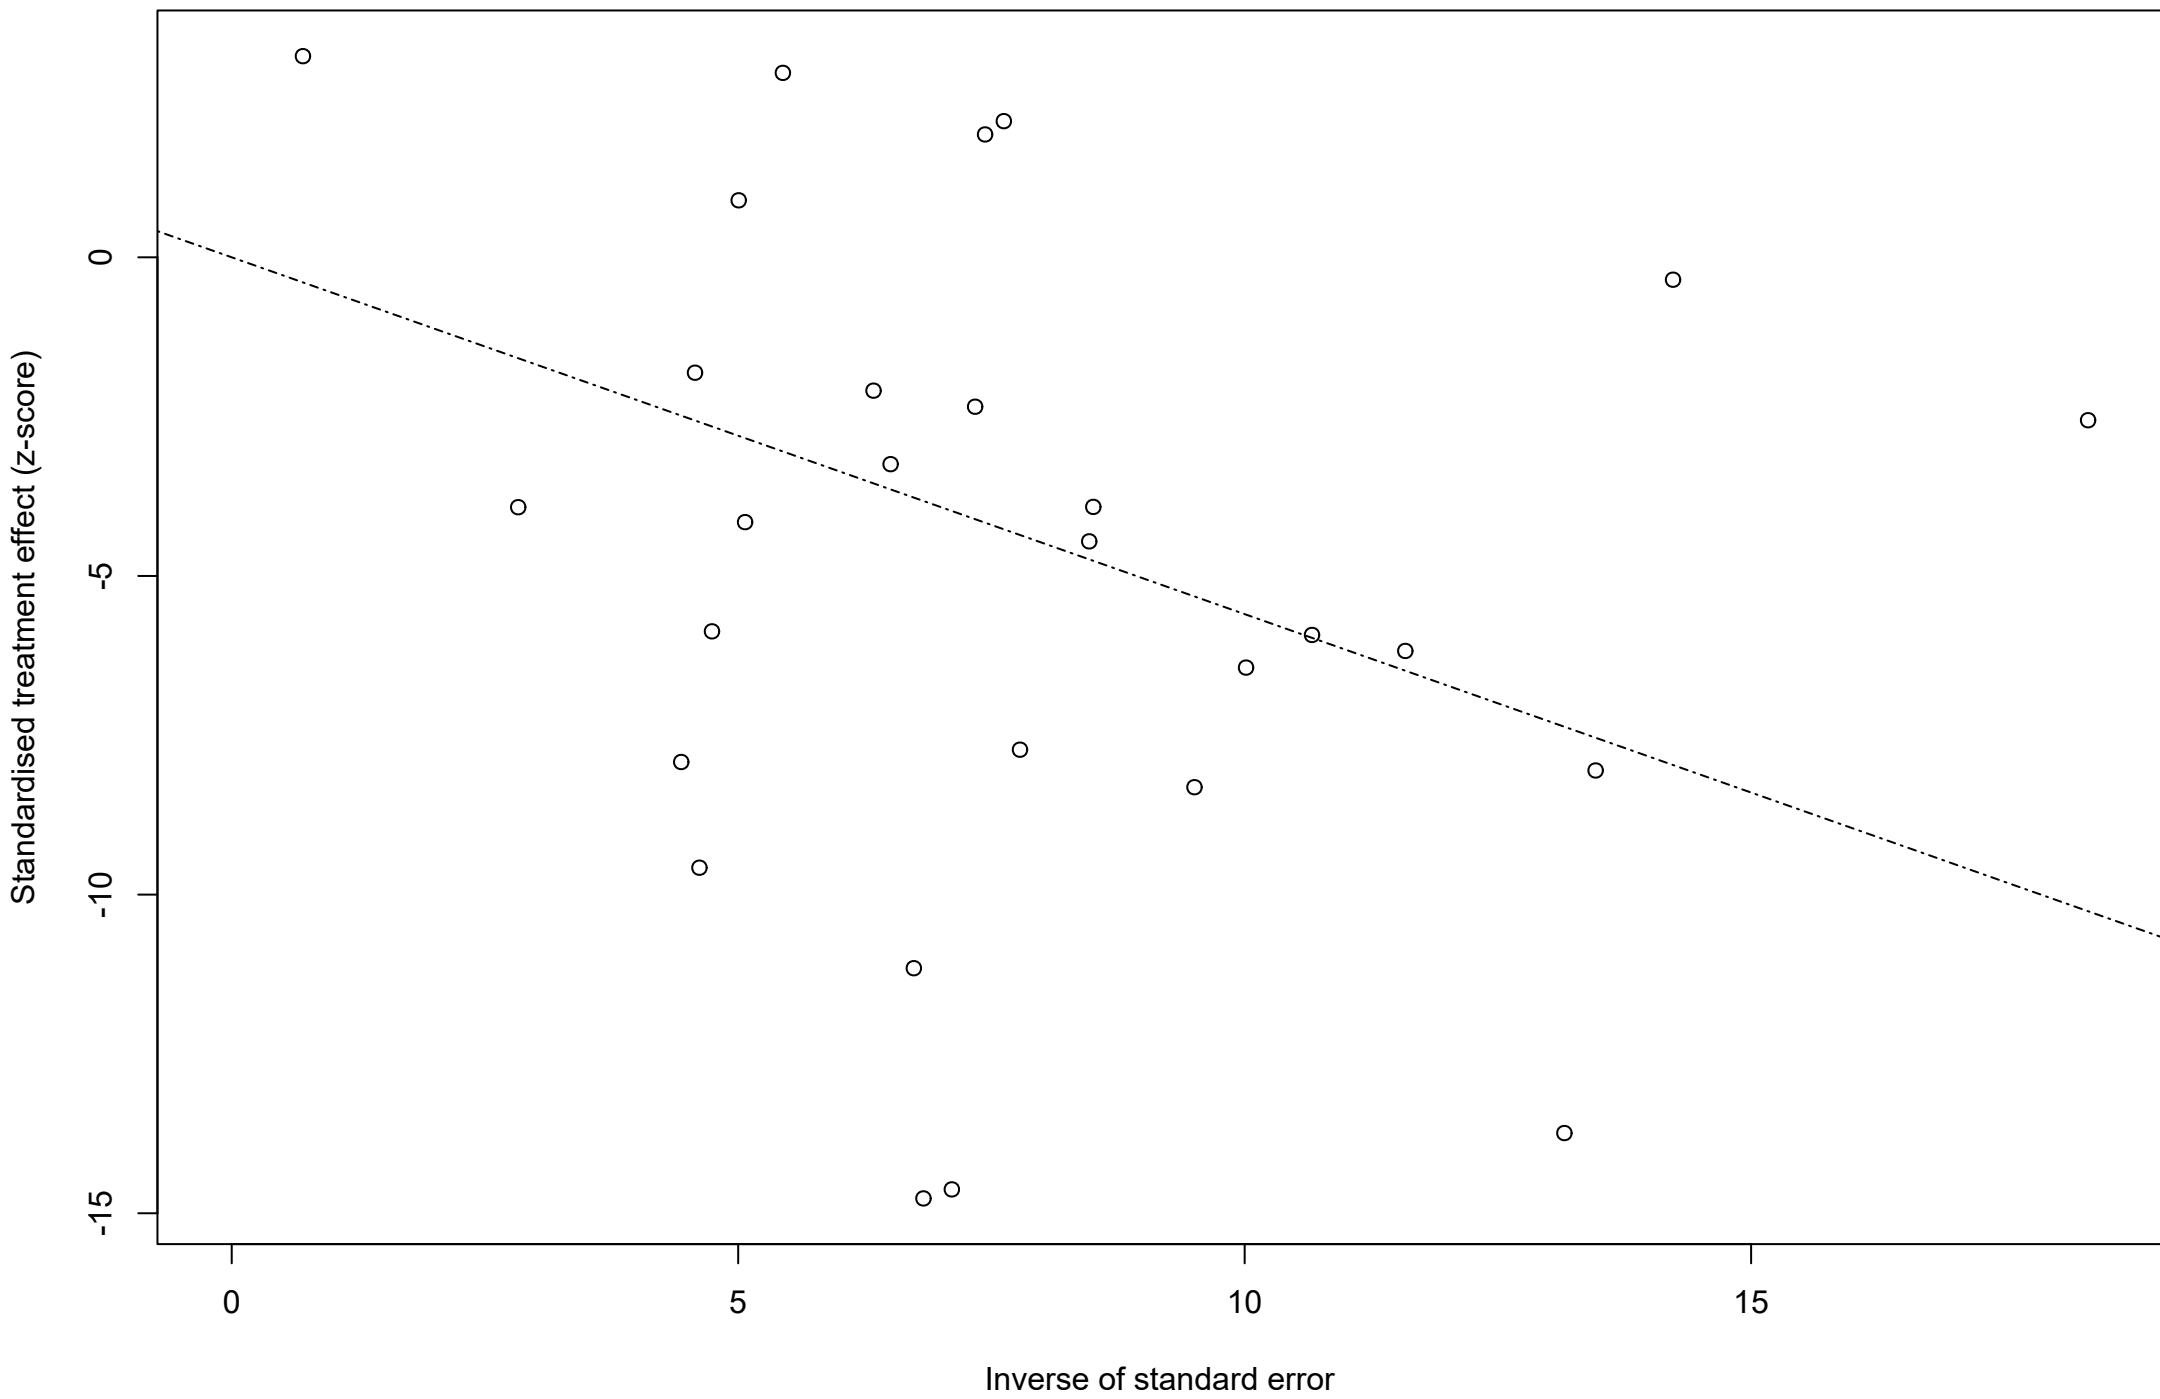

Supplement: 40675_2023_258_MOESM6_ESM.pdf [file 40675_2023_258_MOESM6_ESM.pdf]

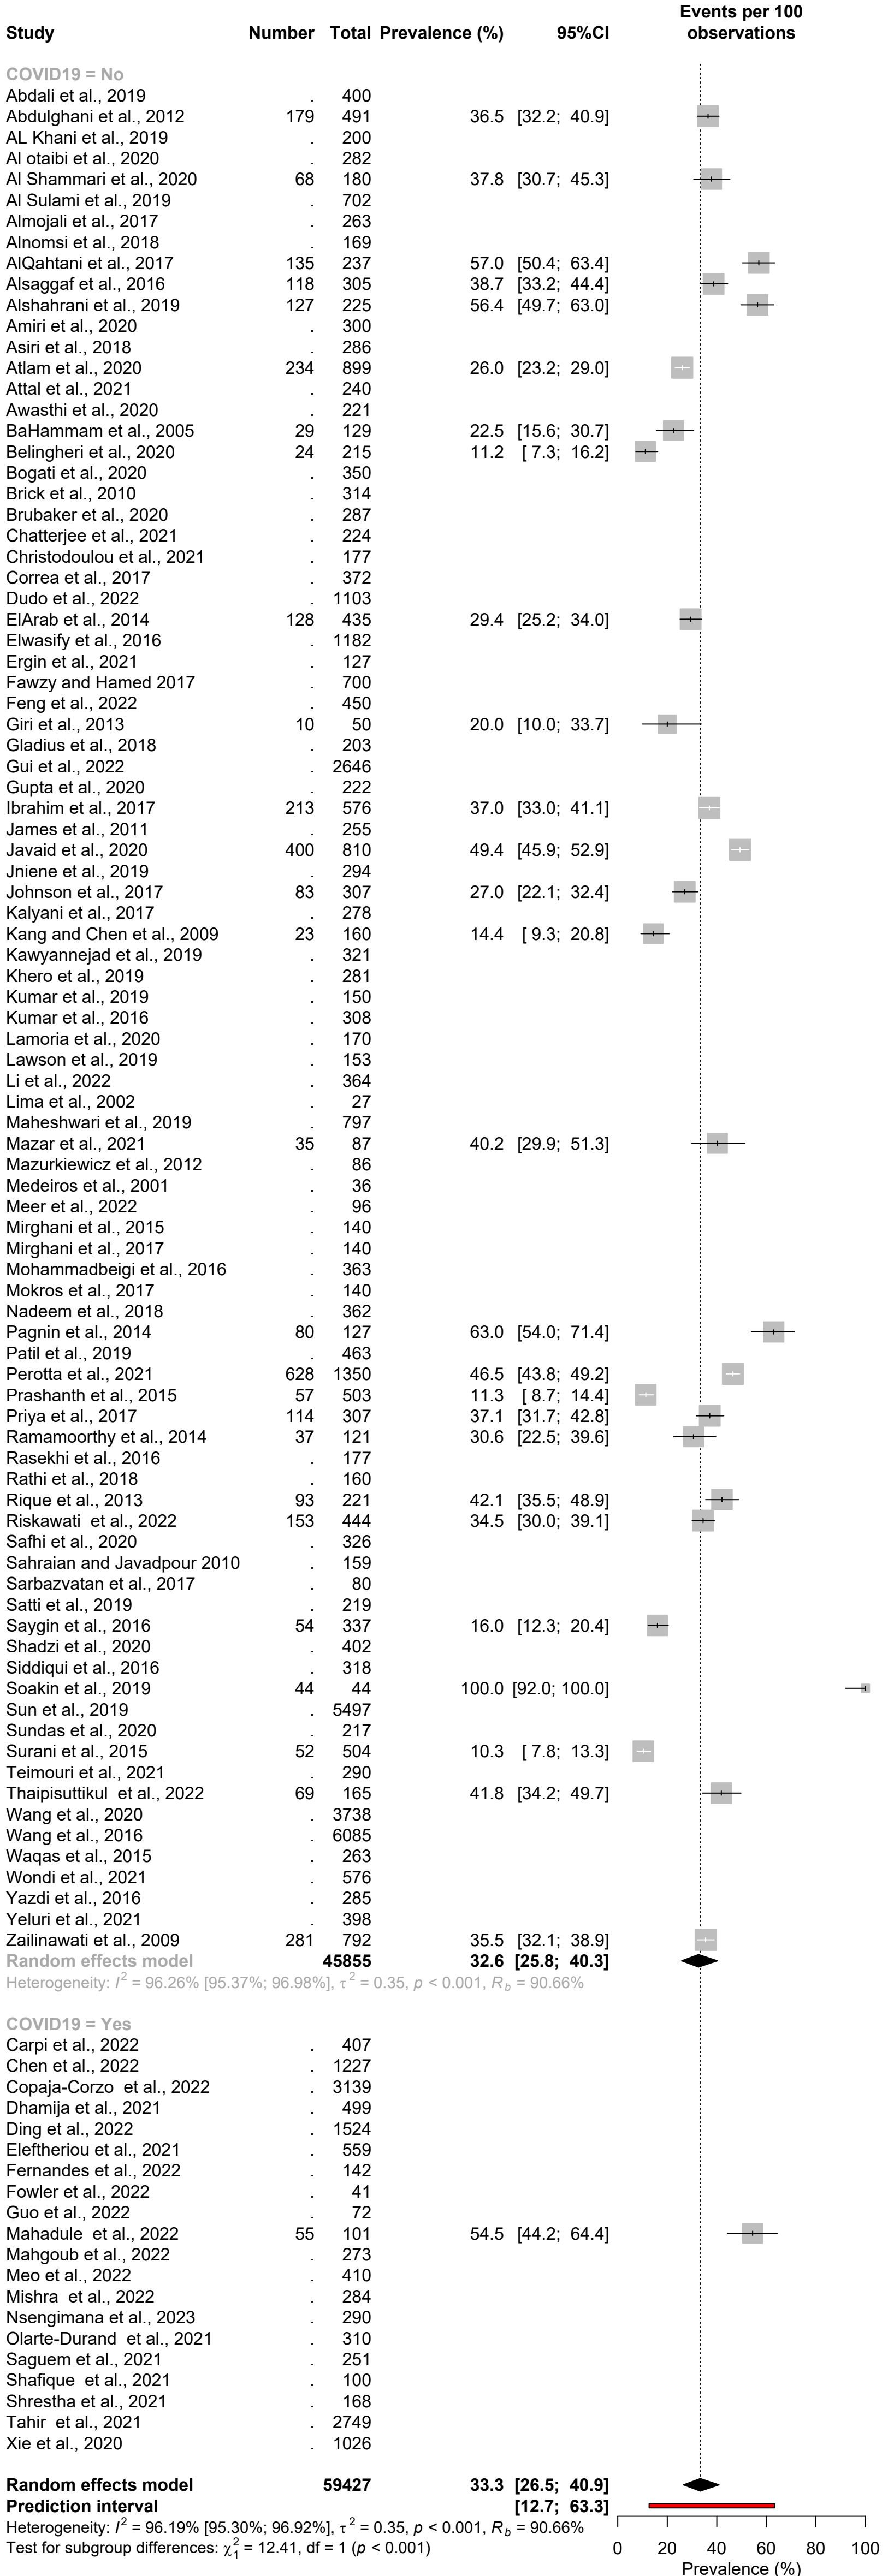

Supplement: 40675_2023_258_MOESM7_ESM.pdf [file 40675_2023_258_MOESM7_ESM.pdf]

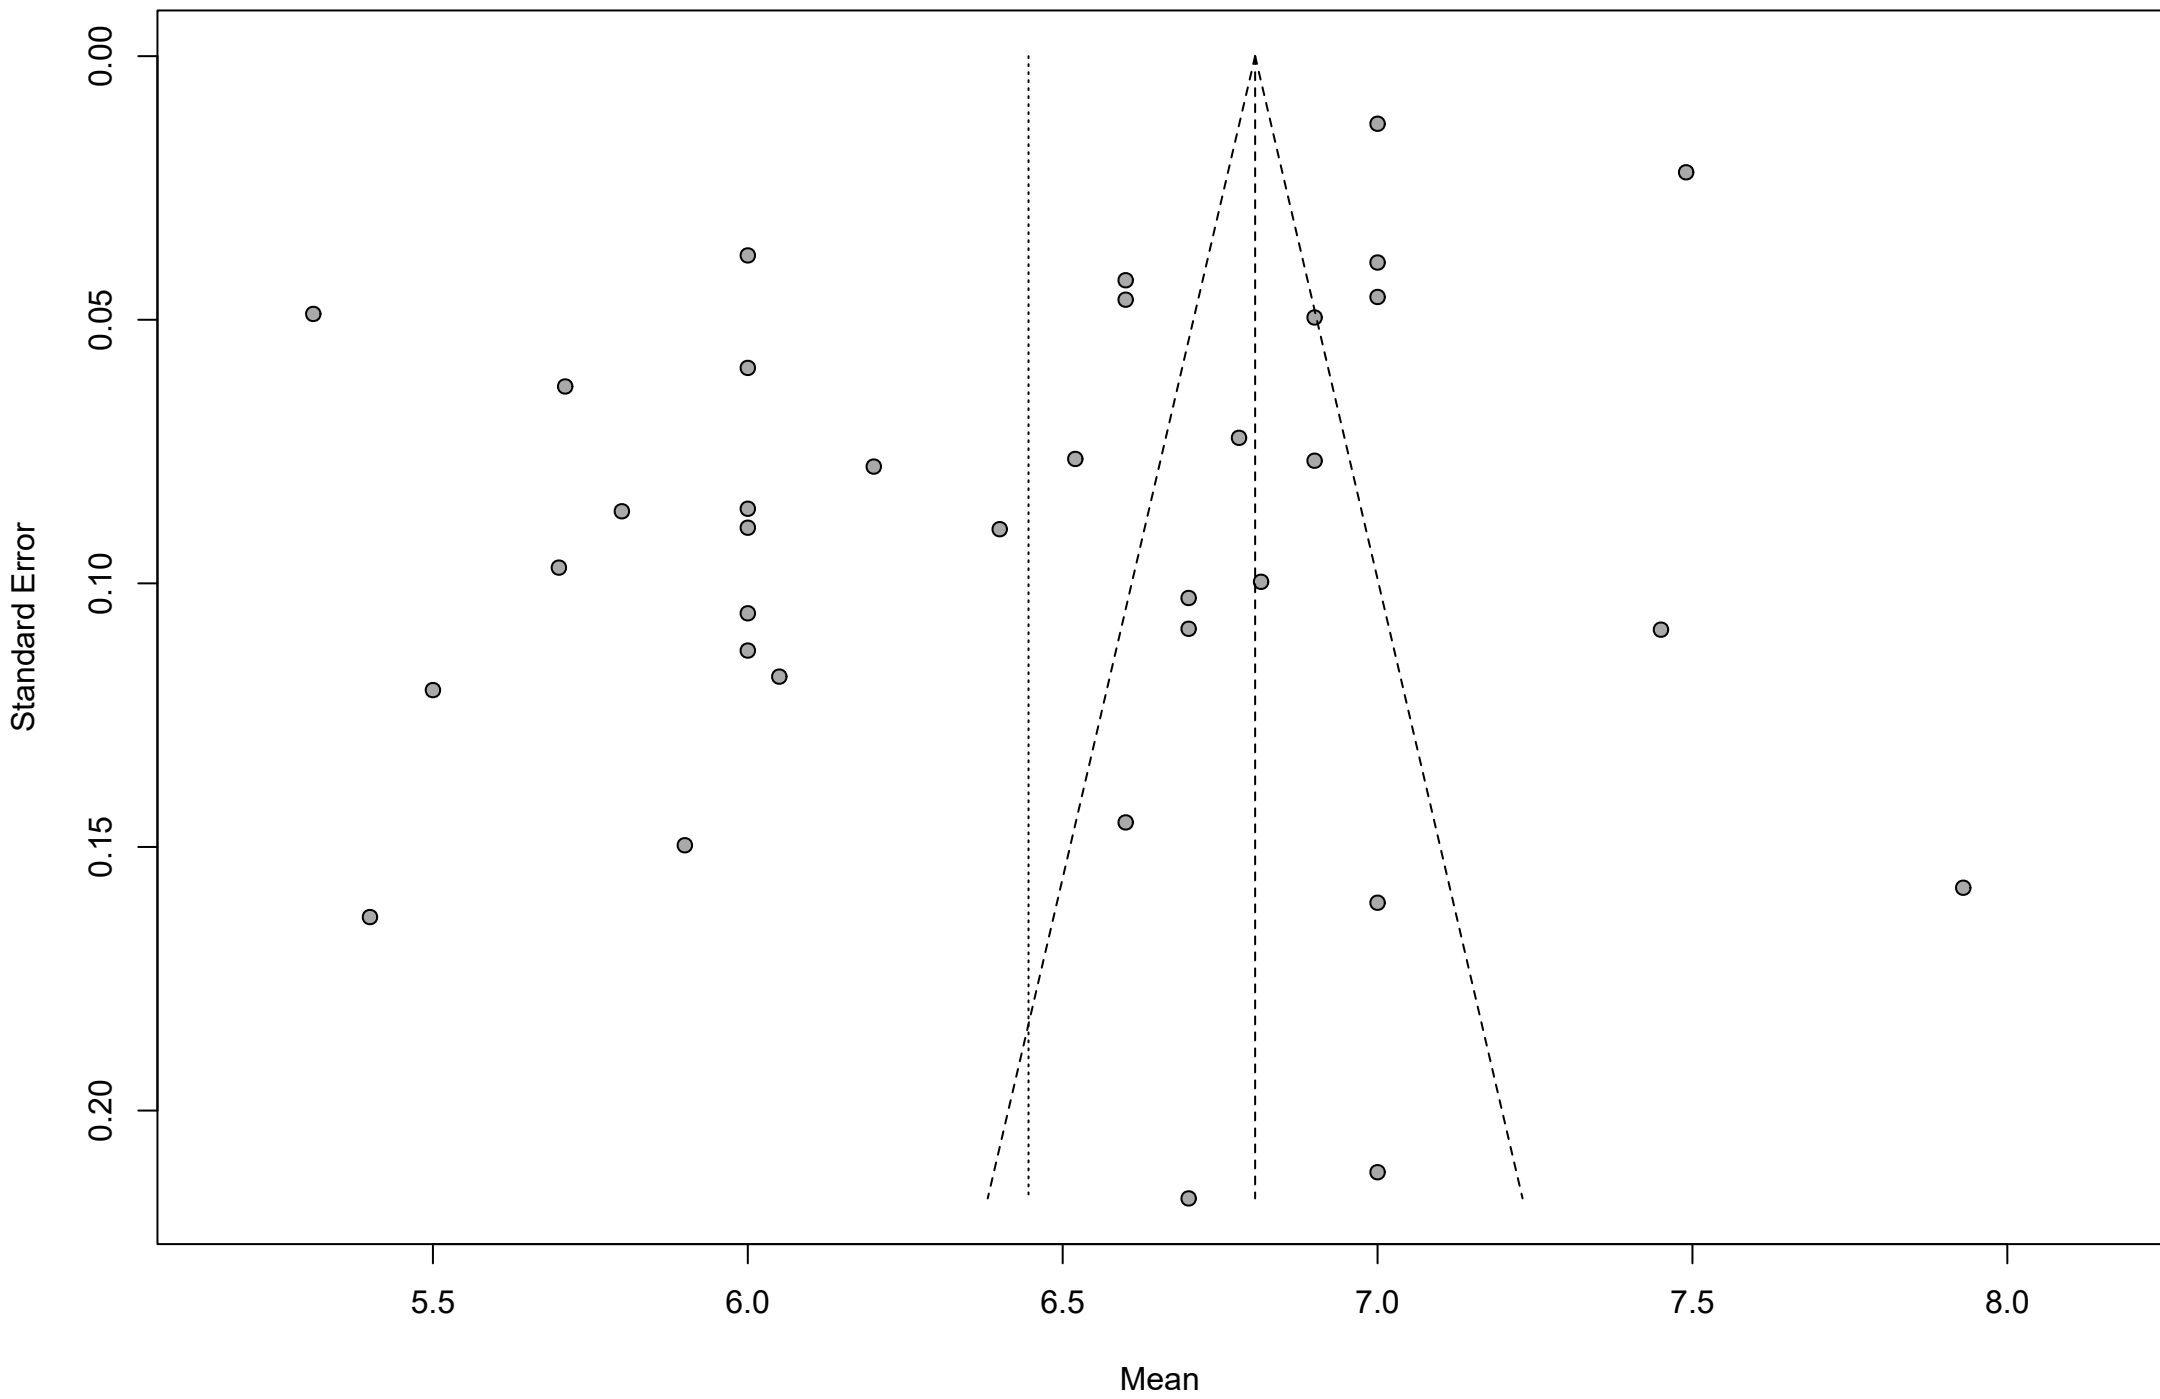

Supplement: 40675_2023_258_MOESM8_ESM.pdf [file 40675_2023_258_MOESM8_ESM.pdf]

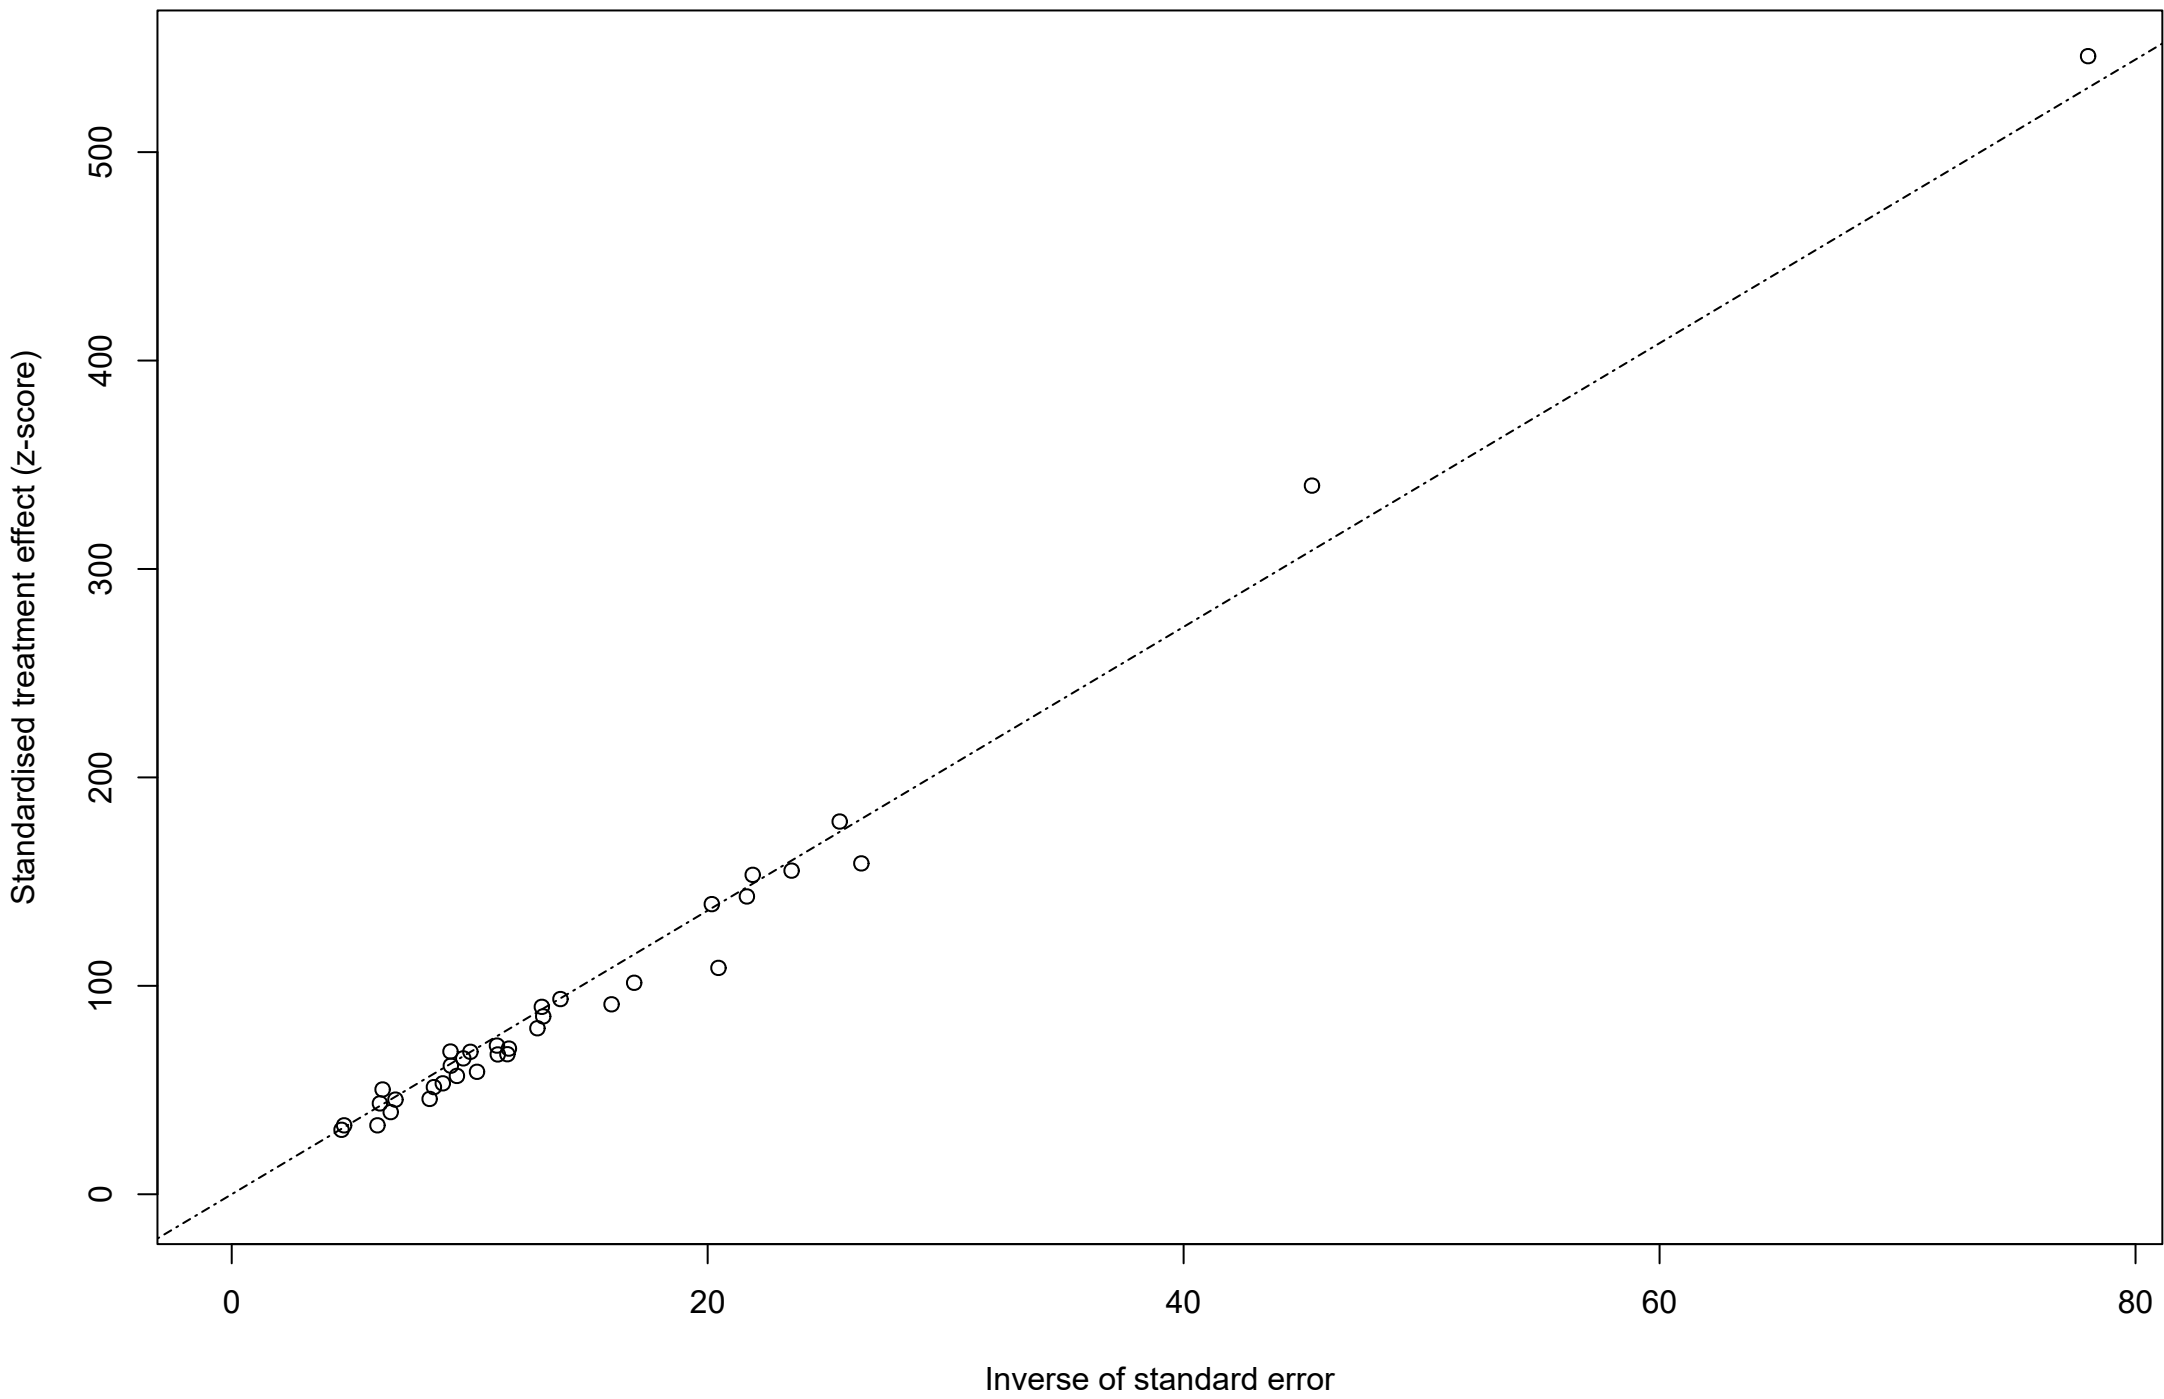

Supplement: 40675_2023_258_MOESM9_ESM.pdf [file 40675_2023_258_MOESM9_ESM.pdf]
